# Supplementary material for: Engineered EVs from LncEEF1G - overexpressing MSCs promote fibrotic liver regeneration by upregulating HGF release from hepatic stellate cells
Source: Springer Nature journal article supplement (doi:10.1038/s12276-025-01413-4), 2025-03-02
Supplement: MOESM1 [file 12276_2025_1413_MOESM1_ESM.pdf]

# Supporting information

## **Engineered Extracellular Vesicles from LncEEF1G-Overexpressing Mesenchymal Stem Cells to Promote Fibrotic Liver Regeneration by Upregulating HGF Release from Hepatic Stellate Cells**

Jiebin Zhang<sup>1, 2, \*</sup>, Xiaotong Qiu<sup>1, 2, \*</sup>, Yunguo Lei<sup>1, 2, 6, \*</sup>, Haitian Chen<sup>1, 2, \*</sup>, Dongwei Wu<sup>1, 2</sup>, Tingting Wang<sup>1, 2</sup>, Xin Sui<sup>5</sup>, Jiaqi Xiao<sup>1, 2</sup>, Chenhao Jiang<sup>1, 2</sup>, Huayao Zhang<sup>8</sup>, Yasong Liu<sup>1, 2</sup>, Xiaoquan Liu<sup>4</sup>, Yingcai Zhang<sup>1, 2</sup>, Xu Che<sup>7</sup>, Ye Lin<sup>3</sup>, Jia Yao<sup>1, 2#</sup>, Zihao Pan<sup>3, #</sup>, Rong Li<sup>2, #</sup>, Jun Zheng<sup>1, 2, #</sup>

## Table of Contents

|                          |    |
|--------------------------|----|
| Fig. S1.....             | 3  |
| Fig. S2.....             | 4  |
| Fig. S3.....             | 5  |
| Fig. S4.....             | 6  |
| Fig. S5.....             | 7  |
| Fig. S6.....             | 8  |
| Fig. S7.....             | 9  |
| Fig. S8.....             | 10 |
| Fig.S9.....              | 12 |
| Supplementary Table..... | 14 |

**Supplementary Figure 1. Extraction and identification of mouse primary hepatic stellate cells.**

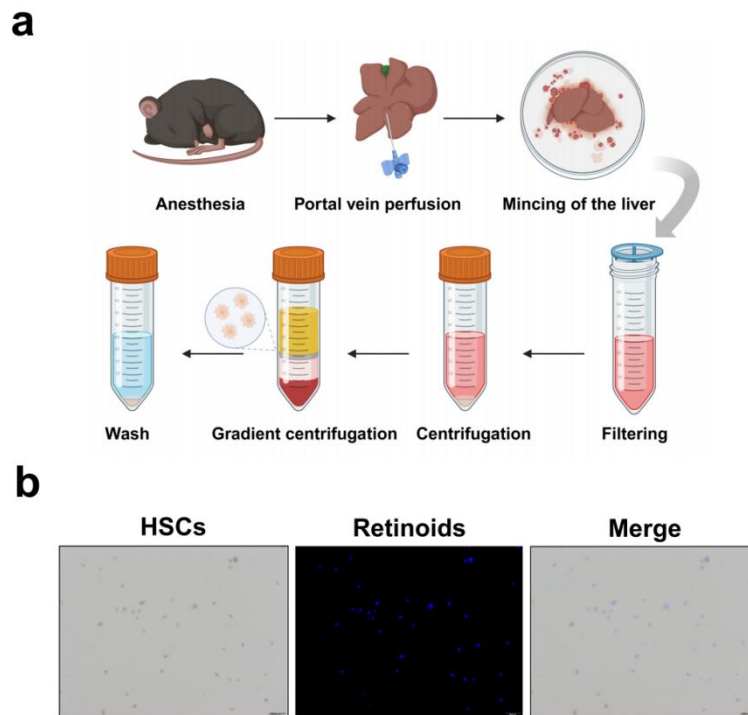

(a) Schematic diagram of extracting and obtaining primary hepatic stellate cells (HSCs) from mouse liver tissue. (b) Representative images of freshly isolated HSCs visualized using phase-contrast microscopy (left) and retinoid fluorescence (middle). A merged image (right) of the retinoid fluorescence with the phase-contrast image

**Supplementary Figure 2. Establishment of a mouse liver fibrosis model via carbon tetrachloride (CCl<sub>4</sub>) treatment.**

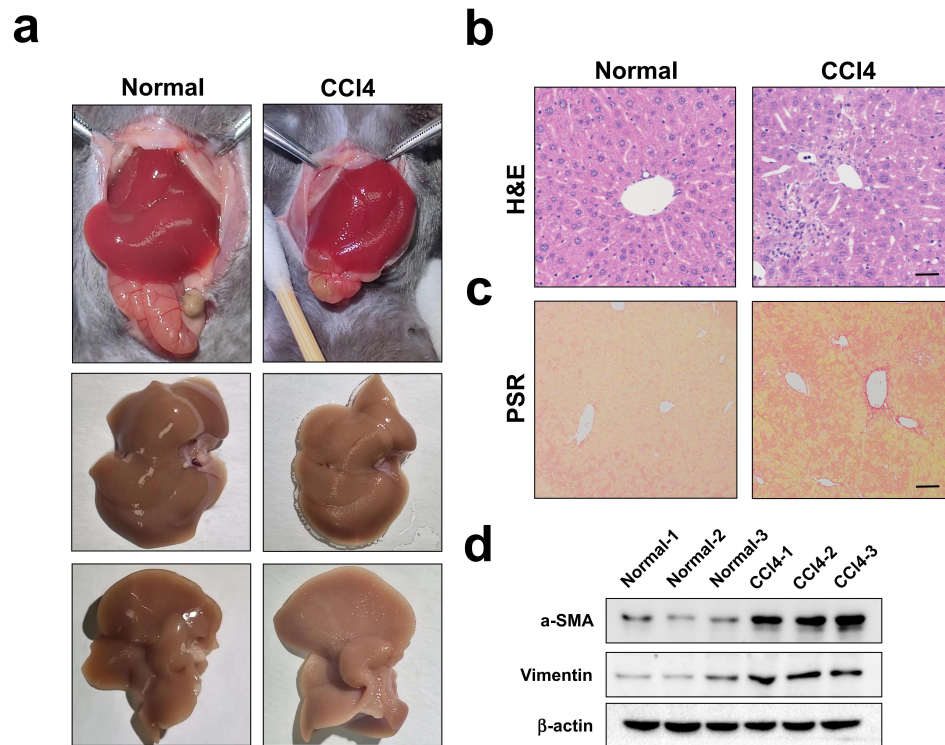

(a) Liver morphology of mice in the normal and CCl<sub>4</sub> treatment group. (b) Representative images for H&E staining for the normal and CCl<sub>4</sub> treatment group (Scale bar = 100 μm, n = 4 independent biological mice samples). (c) Representative liver sections for picrosirius red (PSR) staining of the two groups (Scale bar = 100 μm, n = 4 independent biological mice samples). (d) Western blotting assays showing the expression of α-SMA and vimentin in liver samples of each group.

**Supplementary Figure 3. The expression of miR-181a-5p of hepatic stellate cells.**

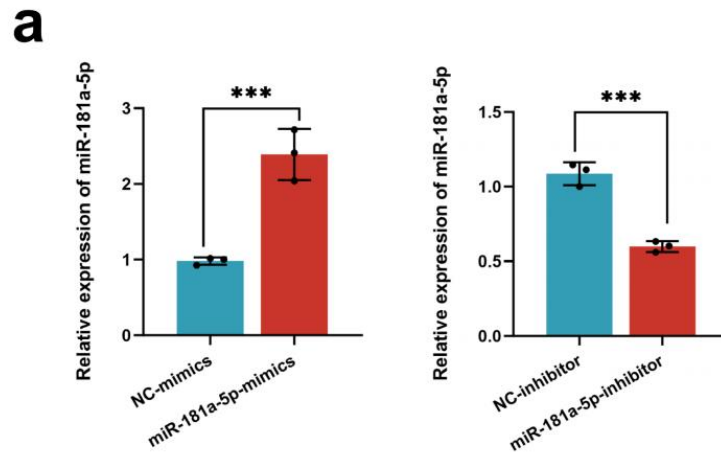

(a) The expression of miR-181a-5p in HSCs was upregulated or downregulated after being transfected with miR-181a-5p mimic or inhibitor, respectively. (n=3 independent cell experiments). Statistic data are presented as the mean  $\pm$  SD, error bars represent the means of three independent experiments. Statistical significance was determined by student's t test. \* $p<0.05$ , \*\* $p<0.01$ , and \*\*\* $p<0.001$ .

**Supplementary Figure 4. Blocking miR-181a-5p expression of HSCs in vivo using AAV6.**

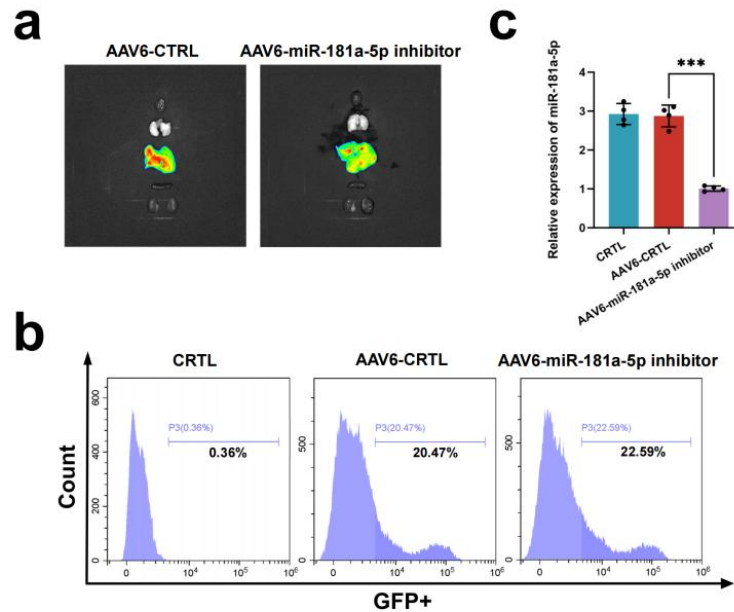

(a) Representative in vivo imaging system (IVIS) images of multiple organs in mice transfected with adeno-associated virus serotype 6 (AAV6) carrying double-stranded CMV bGlobin-eGFP-U6-mmu-miR-181a-5p TuD (AAV6-miR-181a-5p inhibitor) or AAV6-Control. (b) Flow cytometry analysis was performed to investigate the proportion of GFP-positive hepatic stellate cells (HSCs) after AAV6 transfection. (n=4 independent cell experiments). (c) RT-qPCR showing the miR-181a-5p levels of primary HSCs from AAV6 transfected mouse liver (n = 4 independent experiments). Statistical significance was determined by student's t test. \* $p < 0.05$ , \*\* $p < 0.01$ , and \*\*\* $p < 0.001$ . ns no significance.

# Supplementary Figure 5. The biological features of MSCs.

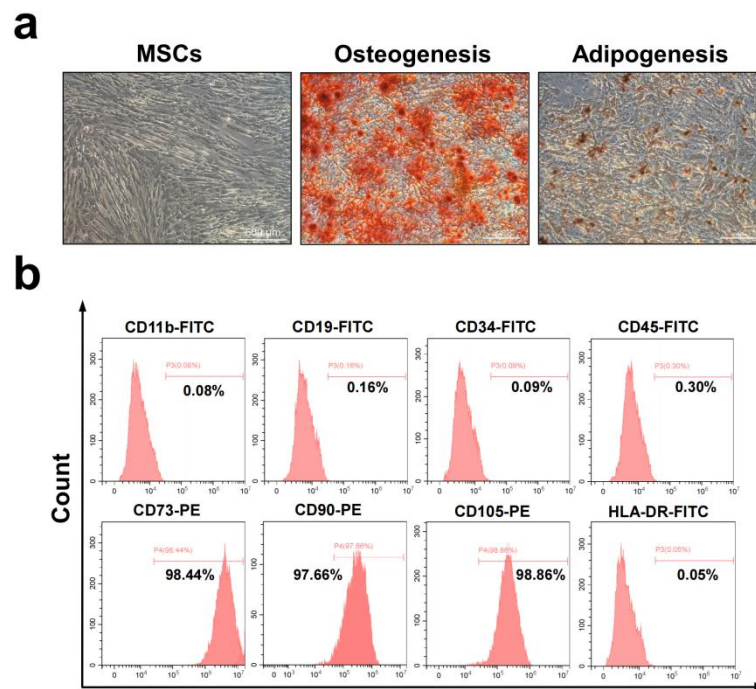

(a) The fibroblast-like morphology of umbilical cord-derived mesenchymal stem cells was observed under a light microscope (left; Scale bar = 500  $\mu\text{m}$ ). Representative images of MSCs differentiating into osteogenesis (middle) and adipogenesis (right) (Scale bar = 200  $\mu\text{m}$ ). (b) Flow cytometry analysis was performed to investigate the expressions of specific markers of MSCs, including CD11b, CD19, CD34, CD45, CD73, CD90, CD105, and HLA-DR.

**Supplementary Figure 6. MSC-EVs alleviates liver fibrosis in the fibrotic PHx model.**

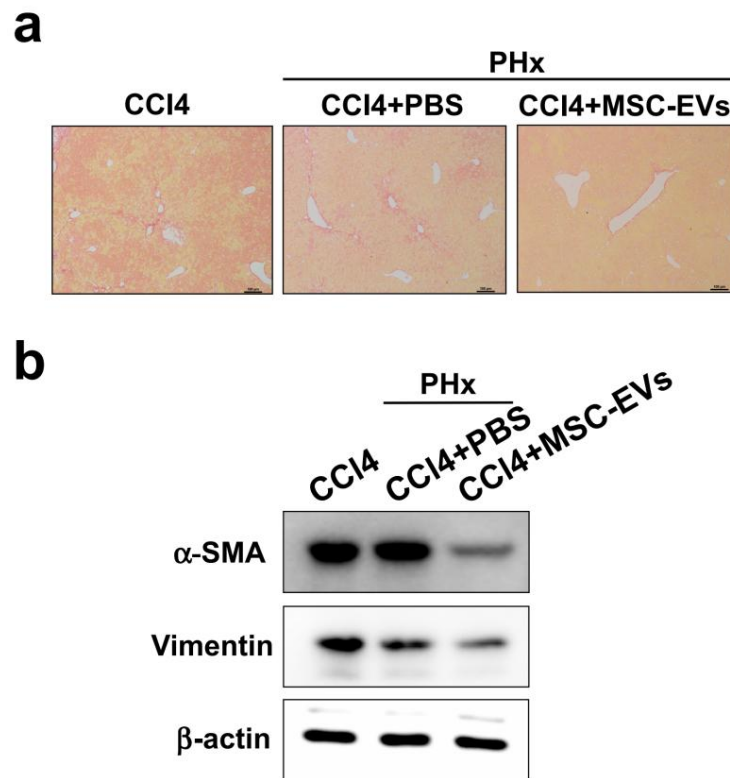

(a) Representative liver sections for picrosirius red (PSR) staining of each group (Scale bar = 100  $\mu$ m, n = 4 independent biological mice samples). (b) Western blotting assays showing the expression of  $\alpha$ -SMA and vimentin in liver samples of each group (n = 4 independent biological mice samples).



**Supplementary Figure 7. The secondary structure of lncEEF1G.**

**a**

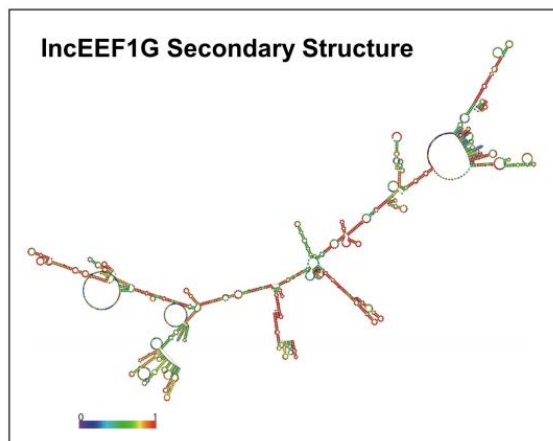

(a) The RNAalifold online tool was employed to predict the secondary structure of lncEEF1G.

**Supplementary Figure 8. The expression of lncEEF1G in MSCs and MSC-EVs and the characterization of MSCs<sup>silncEEF1G</sup> and MSC-EVs<sup>silncEEF1G</sup>.**

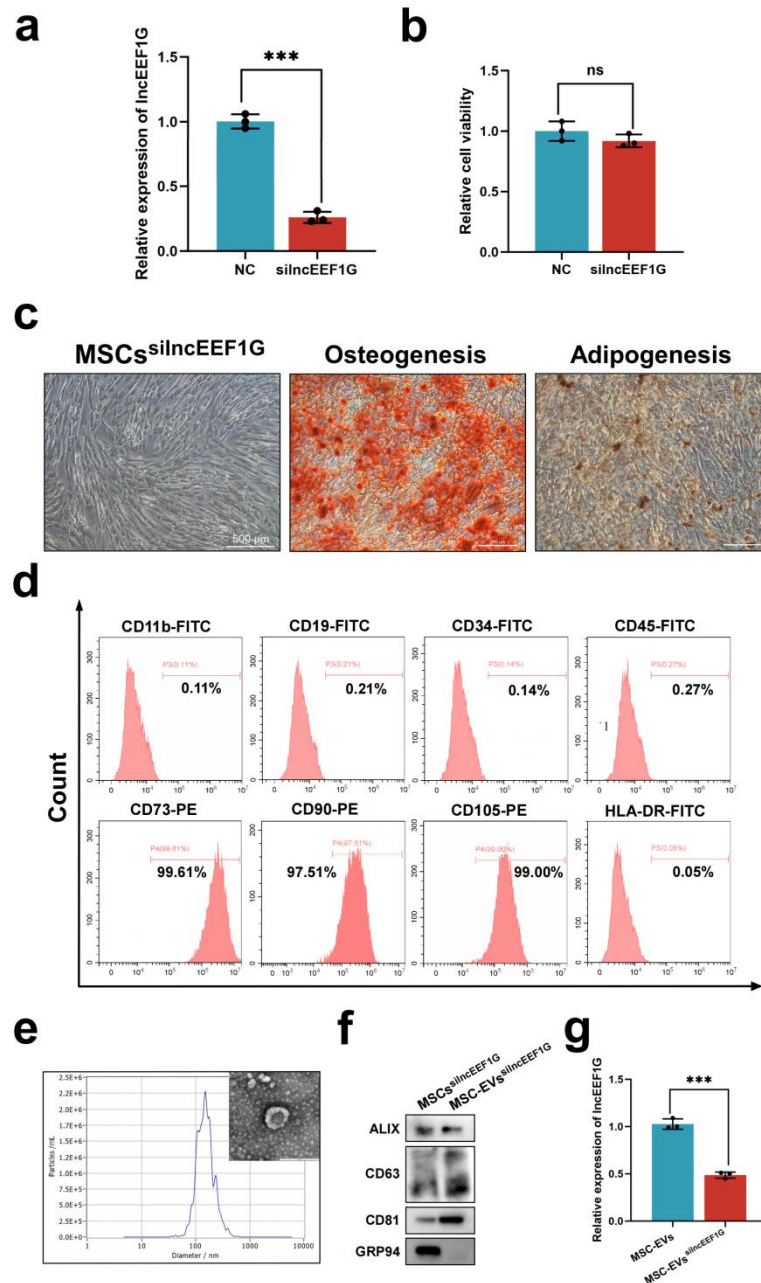

(a) RT-qPCR showing the lncEEF1G levels of MSCs in different treatment groups. (n=3 independent cell experiments). (b) Cell viability of MSCs in different treatment groups. (n=3 independent cell experiments). (c) The fibroblast-like morphology of

MSCs<sup>silncEEF1G</sup> was observed under a light microscope (left, Scale bar = 500  $\mu$ m). Representative images of MSCs<sup>silncEEF1G</sup> differentiating into osteogenesis (middle) and adipogenesis (right) (Scale bar = 200  $\mu$ m). (d) Flow cytometry analysis was performed to investigate the expressions of specific markers of MSCs<sup>silncEEF1G</sup>, including CD11b, CD19, CD34, CD45, CD73, CD90, CD105, and HLA-DR. (e) Transmission electron microscopy (TEM) and nanoparticle tracking analysis (NTA) were used to detect the morphology and size of MSC-EVs<sup>silncEEF1G</sup> (Scale bar = 0.1  $\mu$ m). (f) Western blotting assays showing the expression of the specific vesicle-related markers (ALIX, CD63, CD81, and GRP94). (g) RT-qPCR showing the lncEEF1G levels in EVs of MSCs under different treatments. (n=3 independent cell experiments). Statistical significance was determined by students' t test. \*p<0.05, \*\*p<0.01, and \*\*\*p<0.001.

**Supplementary Figure 9. The biological features of engineered MSCs with overexpressed lncEEF1G.**

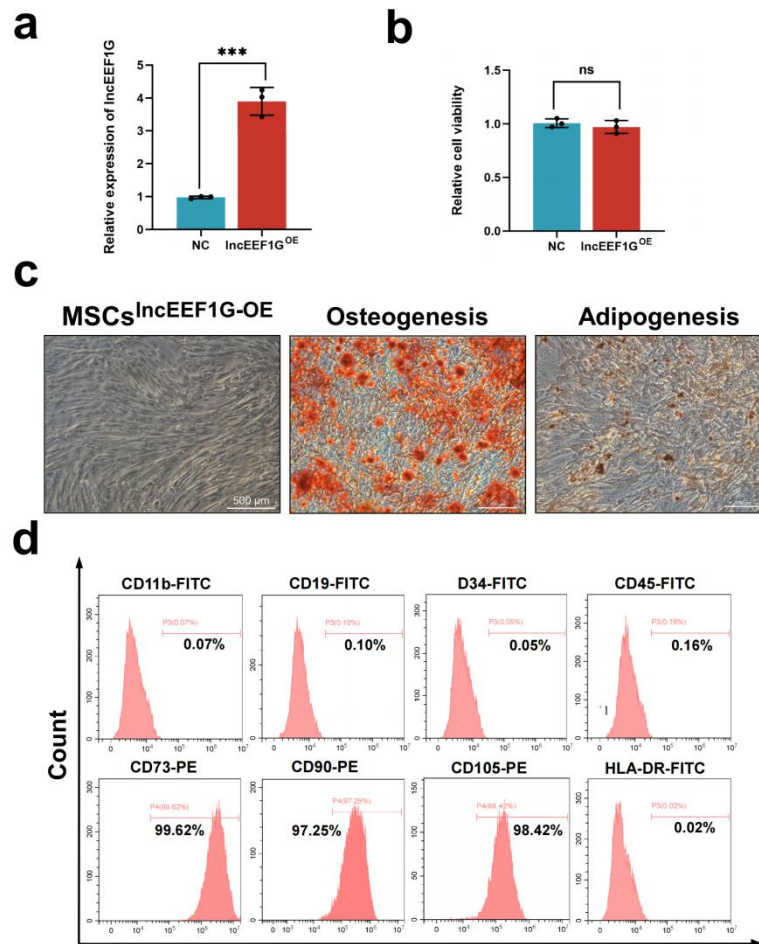

(a) RT-qPCR showing the lncEEF1G levels of MSCs with indicated treatments. (n=3 independent cell experiments). (b) Cell viability of MSCs in each groups. (n=3 independent cell experiments). (c) The fibroblast-like morphology of MSCs<sup>lncEEF1G-OE</sup> was observed under a light microscope (left, Scale bar = 500  $\mu$ m). Representative images of MSCs<sup>lncEEF1G-OE</sup> differentiating into osteogenesis (middle) and adipogenesis (right) (Scale bar = 200  $\mu$ m). (d) Flow cytometry analysis was performed to investigate the expressions of specific markers of MSCs<sup>lncEEF1G-OE</sup>, including CD11b,

CD19, CD34, CD45, CD73, CD90, CD105, and HLA-DR. Statistical significance was determined by student's t test. \* $p < 0.05$ , \*\* $p < 0.01$ , and \*\*\* $p < 0.001$ . ns no significance.

**Supplementary Table 1. Primer sequences for quantitative RT-PCR**

| <b>Gene Symbol</b>    | <b>Sequence direction</b> | <b>Sequence</b>                |
|-----------------------|---------------------------|--------------------------------|
| Mouse-HGF             | Forward primer            | 5'- ATGTGGGGGACCAAACCTTCTG -3' |
|                       | Reverse primer            | 5'- GGATGGCGACATGAAGCAG -3'    |
| Mouse- TGF- $\beta$   | Forward primer            | 5'- CTCCCGTGGCTTCTAGTGC -3'    |
|                       | Reverse primer            | 5'- GCCTTAGTTTGGACAGGATCTG -3' |
| Mouse- $\beta$ -actin | Forward primer            | 5'- GGCTGTATTCCCCTCCATCG -3'   |
|                       | Reverse primer            | 5'- CCAGTTGGTAACAATGCCATGT -3' |
| Human- HGF            | Forward primer            | 5'- GAGAGTTGGGTCTTACTGCACG -3' |
|                       | Reverse primer            | 5'- CTCATCTCCTCTTCCGTGGACA -3' |
| Human-GAPDH           | Forward primer            | 5'- GTCTCCTCTGACTTCAACAGCG -3' |
|                       | Reverse primer            | 5'- ACCACCCTGTTGCTGTAGCCAA -3' |
